# Supplementary material
Source: MDPI journal article supplement (https://www.mdpi.com/2073-4344/12/11/1388)
Supplement: s1 [file s1]

# Accelerated Decoloration of Organic Dyes from Wastewater Using Ternary Metal/g-C<sub>3</sub>N<sub>4</sub>/ZnO Nanocomposites: An Investigation of Impact of g-C<sub>3</sub>N<sub>4</sub> Concentration and Ni and Mn Doping

Muhammad Azam Qamar <sup>1,\*</sup>, Sammia Shahid <sup>1</sup>, Mohsin Javed <sup>1</sup>, Mohammad Shariq <sup>2,\*</sup>, Mohammed M. Fadhali <sup>2,3</sup>, Osama Madkhali <sup>2</sup>, Syed Kashif Ali <sup>4</sup>, Imam Saheb Syed <sup>4</sup>, Majed Yusef Awaji <sup>2,5</sup>, Mohd. Shakir Khan <sup>6,\*</sup>, Dalin A. Hassan <sup>7</sup> and M. Hisham Al Nasir <sup>8</sup>

<sup>1</sup> Department of Chemistry, School of Science, University of Management and Technology, Lahore 54770, Pakistan

<sup>2</sup> Department of Physics, College of Science, Jazan University, Jazan 45142, Saudi Arabia

<sup>3</sup> Department of Physics, Faculty of Science, Ibb University, Ibb 70270, Yemen

<sup>4</sup> Department of Chemistry, College of Science, Jazan University, Jazan 45142, Saudi Arabia

<sup>5</sup> UMR CNRS 7198, Institute Jean Lamour, University of Lorraine, 54011 Nancy, France

<sup>6</sup> Department of Physics, College of Science, Al-Zulfi, Majmaah University, Al-Majmaah 11952, Saudi Arabia

<sup>7</sup> Department of Pharmacology and Toxicology, College of Pharmacy, Jazan University, Jazan 45142, Saudi Arabia

<sup>8</sup> Department of Applied Physics, Federal Urdu University of Arts Science and Technology, Islamabad 44000, Pakistan

\* Correspondence: qamariub@gmail.com (M.A.Q.); mohammadshariq@jazanu.edu.sa (M.S.); ms.khan@mu.edu.sa (M.S.K.)

**Table S1.** Composition of the synthesized Ni/g-C<sub>3</sub>N<sub>4</sub>/ZnO composites.

| Sr. No | Nanocomposites                             | Nickle Nitrate | Zinc Acetate | g-C <sub>3</sub> N <sub>4</sub> | Code    |
|--------|--------------------------------------------|----------------|--------------|---------------------------------|---------|
| 1      | Ni/20%g-C <sub>3</sub> N <sub>4</sub> /ZnO | 0.174 g        | 2. 20 g      | 0.34 g                          | Ni/20GZ |
| 2      | Ni/30%g-C <sub>3</sub> N <sub>4</sub> /ZnO | 0.174 g        | 2. 20 g      | 0.51 g                          | Ni/30GZ |
| 3      | Ni/40%g-C <sub>3</sub> N <sub>4</sub> /ZnO | 0.174 g        | 2. 20 g      | 0.68 g                          | Ni/40GZ |
| 4      | Ni/50%g-C <sub>3</sub> N <sub>4</sub> /ZnO | 0.174 g        | 2. 20 g      | 0.85 g                          | Ni/50GZ |
| 5      | Ni/60%g-C <sub>3</sub> N <sub>4</sub> /ZnO | 0.174 g        | 2. 20 g      | 1. 02 g                         | Ni/60GZ |
| 6      | Ni/70%g-C <sub>3</sub> N <sub>4</sub> /ZnO | 0.174 g        | 2. 20 g      | 2. 19 g                         | Ni/70GZ |
| 7      | Ni/70%g-C <sub>3</sub> N <sub>4</sub> /ZnO | 0.174 g        | 2. 20 g      | 2. 19 g                         | Ni/80GZ |

**Table S2.** Composition of the synthesized Mn/g-C<sub>3</sub>N<sub>4</sub>/ZnO composites.

| Sr. No | Nanocomposites                             | Manganese Chloride | Zinc Acetate | g-C <sub>3</sub> N <sub>4</sub> | Code    |
|--------|--------------------------------------------|--------------------|--------------|---------------------------------|---------|
| 1      | Mn/20%g-C <sub>3</sub> N <sub>4</sub> /ZnO | 0.120 g            | 2. 20 g      | 0.34 g                          | Mn/20GZ |
| 2      | Mn/30%g-C <sub>3</sub> N <sub>4</sub> /ZnO | 0.120 g            | 2. 20 g      | 0.51 g                          | Mn/30GZ |
| 3      | Mn/40%g-C <sub>3</sub> N <sub>4</sub> /ZnO | 0.120 g            | 2. 20 g      | 0.68 g                          | Mn/40GZ |
| 4      | Mn/50%g-C <sub>3</sub> N <sub>4</sub> /ZnO | 0.120 g            | 2. 20 g      | 0.85 g                          | Mn/50GZ |
| 5      | Mn/60%g-C <sub>3</sub> N <sub>4</sub> /ZnO | 0.120 g            | 2. 20 g      | 1. 02 g                         | Mn/60GZ |
| 6      | Mn/70%g-C <sub>3</sub> N <sub>4</sub> /ZnO | 0.120 g            | 2. 20 g      | 2. 19 g                         | Mn/70GZ |
| 7      | Mn/70%g-C <sub>3</sub> N <sub>4</sub> /ZnO | 0.120 g            | 2. 20 g      | 2. 19 g                         | Mn/80GZ |

**Table S3.** Elemental data of ZnO nanoparticles.

| Element | Weight % | Atomic % |
|---------|----------|----------|
| O K     | 29.10    | 65.63    |
| Zn K    | 70.90    | 34.33    |
| Total   | 100.00   |          |

**Table S4.** Elemental data of g-C<sub>3</sub>N<sub>4</sub> nanosheets.

| Element | Weight % | Atomic % |
|---------|----------|----------|
| C K     | 39.85    | 45.22    |
| N K     | 56.69    | 52.10    |
| O K     | 3.46     | 2.70     |
| Total   | 100.00   |          |

**Table S5.** Elemental data of Mn/g-C<sub>3</sub>N<sub>4</sub>/ZnO nanocomposites.

| Element | Weight % | Atomic % |
|---------|----------|----------|
| C K     | 17.55    | 23.28    |
| N K     | 26.31    | 29.97    |
| O K     | 43.68    | 43.61    |
| Zn K    | 9.47     | 2.32     |
| Mn      | 2.99     | 0.89     |
| Total   | 100.00   |          |

**Table S6.** Elemental data of Ni/g-C<sub>3</sub>N<sub>4</sub>/ZnO nanocomposites..

| Element | Weight % | Atomic % |
|---------|----------|----------|
| C K     | 18.44    | 24.72    |
| N K     | 25.26    | 27.76    |
| O K     | 43.22    | 43.29    |
| Zn K    | 10.19    | 3.11     |
| Ni      | 2.89     | 0.85     |
| Total   | 100.00   |          |

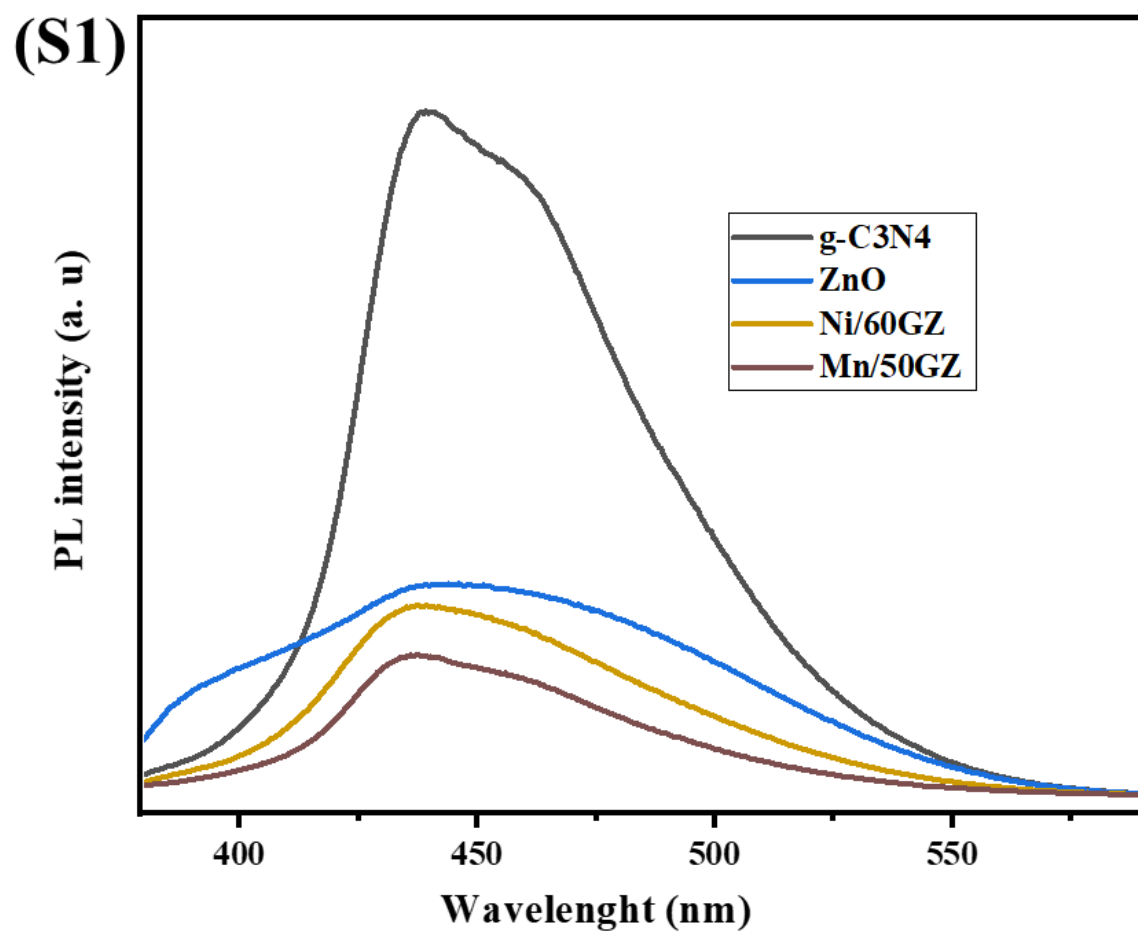

**Figure S1.** Photoluminescence spectra of ZnO, Ni/60GZ, Mn/50GZ, and g-C<sub>3</sub>N<sub>4</sub> samples.
